# Supplementary material for: Carotenoid coloration and health status of urban Eurasian kestrels (Falco tinnunculus)
Source: PubMed Central journal article supplement (PMC5805255; doi:10.1371/journal.pone.0191956), 2018-02-08
Supplement: pone.0191956.s001.pdf [file pone.0191956.s001.pdf]

## Supporting information:

“Carotenoid coloration and health status of urban Eurasian kestrels (*Falco tinnunculus*)”

Petra Sumasgutner, Marius Adrion, Anita Gamauf

**S1 Table:** Results of a Principal Components Analysis (PCA) on the colour chart measurements of 3 body parts of kestrel nestlings: tarsus, cere and orbital ring. PCs 1 and 2 were used as "face skin yellowness" and "tarsus skin yellowness", respectively, throughout the manuscript.

| <b>Rotation:</b>                 | <b>PC1</b> | <b>PC2</b> | <b>PC3</b> |
|----------------------------------|------------|------------|------------|
| Tarsus RGB                       | 0.31       | -0.95      | 0.07       |
| Cere RGB                         | 0.66       | 0.27       | 0.71       |
| Orbital ring RGB                 | 0.69       | 0.17       | -0.70      |
| <b>Importance of components:</b> |            |            |            |
| Standard deviation               | 69.99      | 32.67      | 12.82      |
| Proportion of Variance           | 0.80       | 0.17       | 0.03       |
| Cumulative Proportion            | 0.80       | 0.97       | 1.00       |
