# Supplementary material for: Carotenoid coloration and health status of urban Eurasian kestrels (Falco tinnunculus)
Source: PubMed Central journal article supplement (PMC5805255; doi:10.1371/journal.pone.0191956), 2018-02-08
Supplement: pone.0191956.s003.pdf [file pone.0191956.s003.pdf]

**Supporting information:**

“Carotenoid coloration and health status of urban Eurasian kestrels (*Falco tinnunculus*)”

Petra Sumasgutner, Marius Adrion, Anita Gamauf

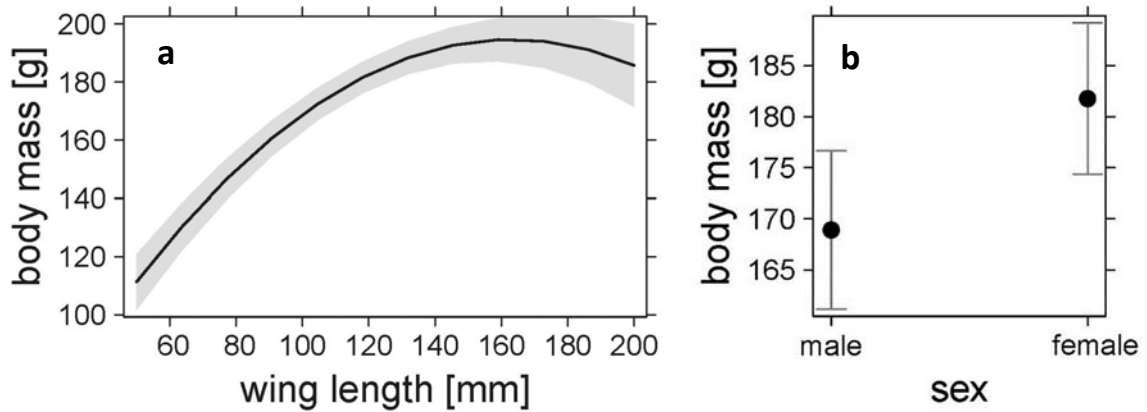

**S2 Fig.** Result of the best model of a GLMM on body mass of urban kestrel nestlings (see Table 1): Effects of (a) wing length, and (b) sex contribute significantly to the best model. The model explains 51% of the variance in body mass (note: inward ticks on the x-axis show sample sizes).
