# Supplementary material for: Carotenoid coloration and health status of urban Eurasian kestrels (Falco tinnunculus)
Source: PubMed Central journal article supplement (PMC5805255; doi:10.1371/journal.pone.0191956), 2018-02-08
Supplement: pone.0191956.s004.pdf [file pone.0191956.s004.pdf]

### Supporting information:

“Carotenoid coloration and health status of urban Eurasian kestrels (*Falco tinnunculus*)”

Petra Sumasgutner, Marius Adrion, Anita Gamauf

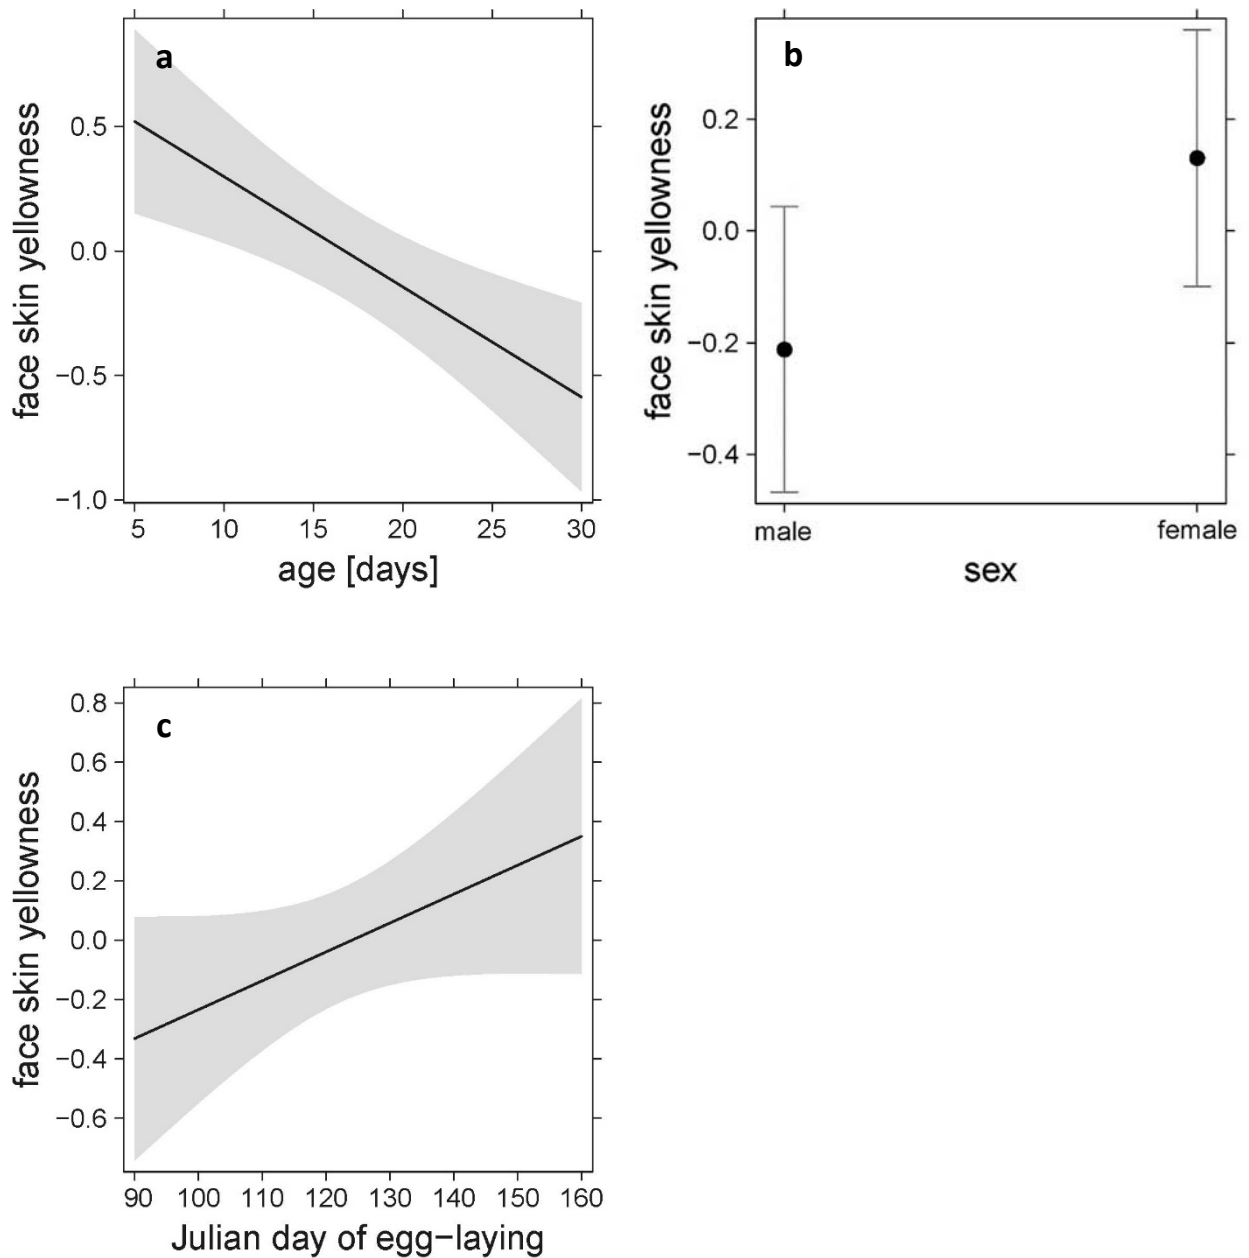

**S3 Fig.** Result of the best model of a GLMM on face skin yellowness of urban kestrel nestlings (see Table 1). Effects of (a) age of nestlings, (b) nestling sex, (c) egg-laying date and urban gradient contribute significantly to the best model. The model explains 24% of the variance in face skin yellowness.
